# Supplementary material for: Nicotinic Acetylcholine Receptor Alpha6 Contributes to Antiviral Immunity via IMD Pathway in Drosophila melanogaster
Source: MDPI journal article supplement (doi:10.3390/v16040562), 2024-04-03
Supplement: s1 [file s1]

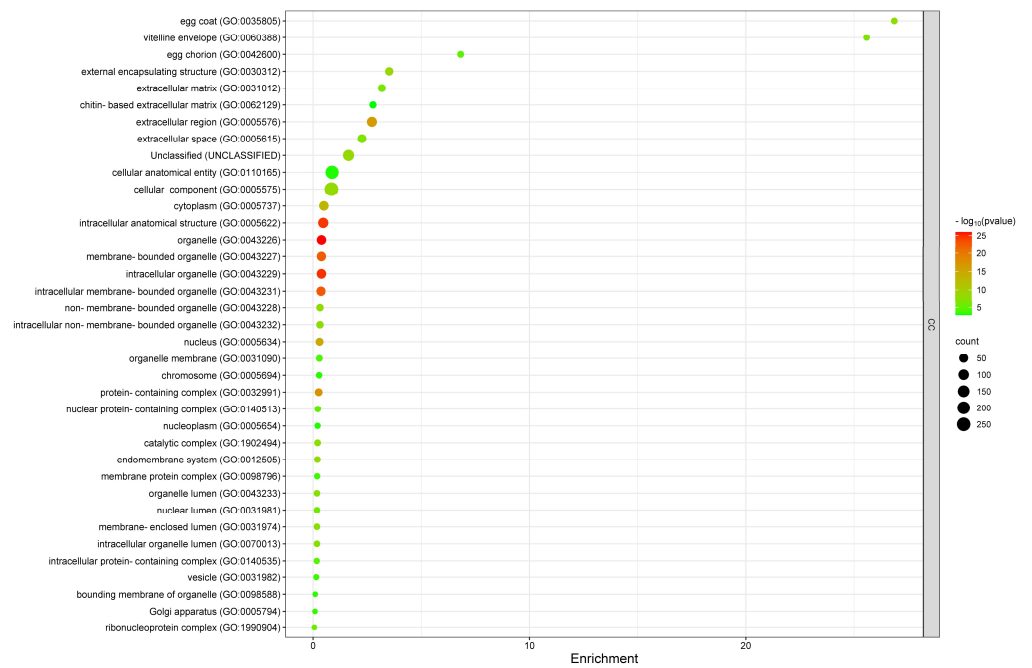

(A)

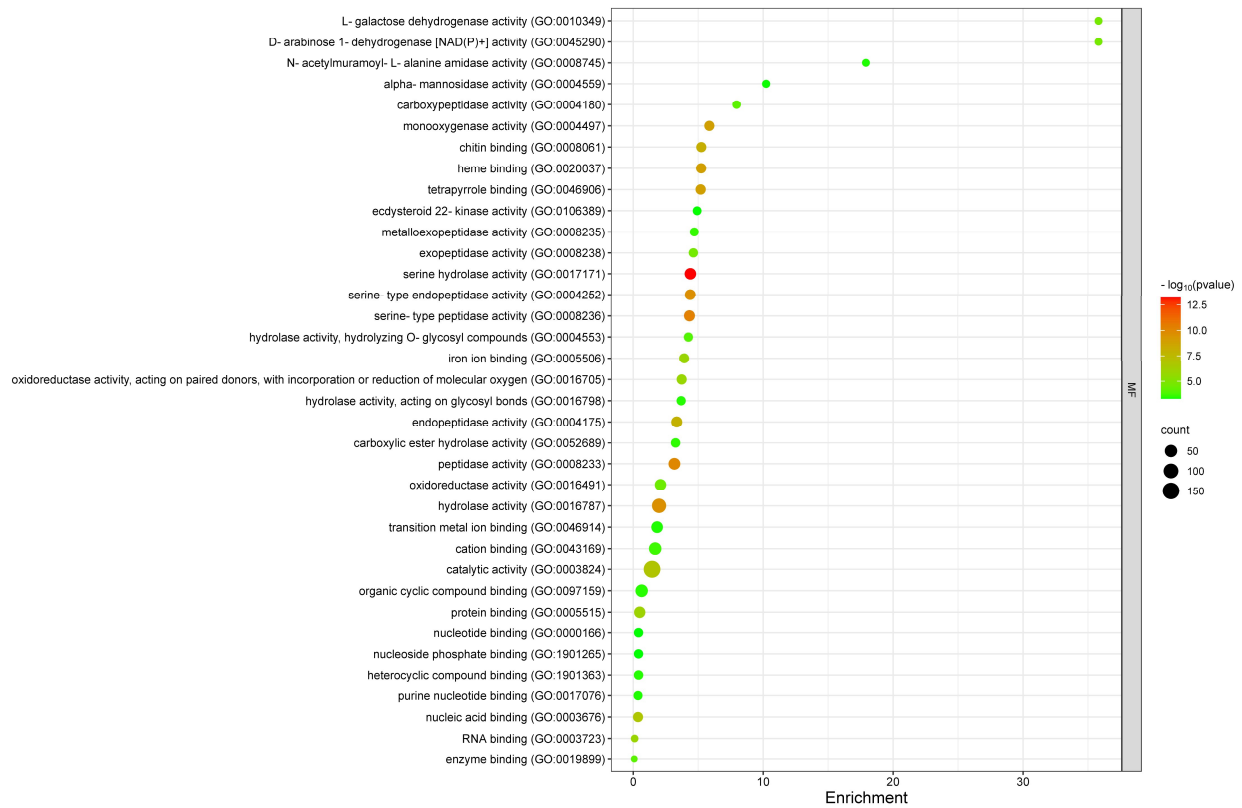

(B)

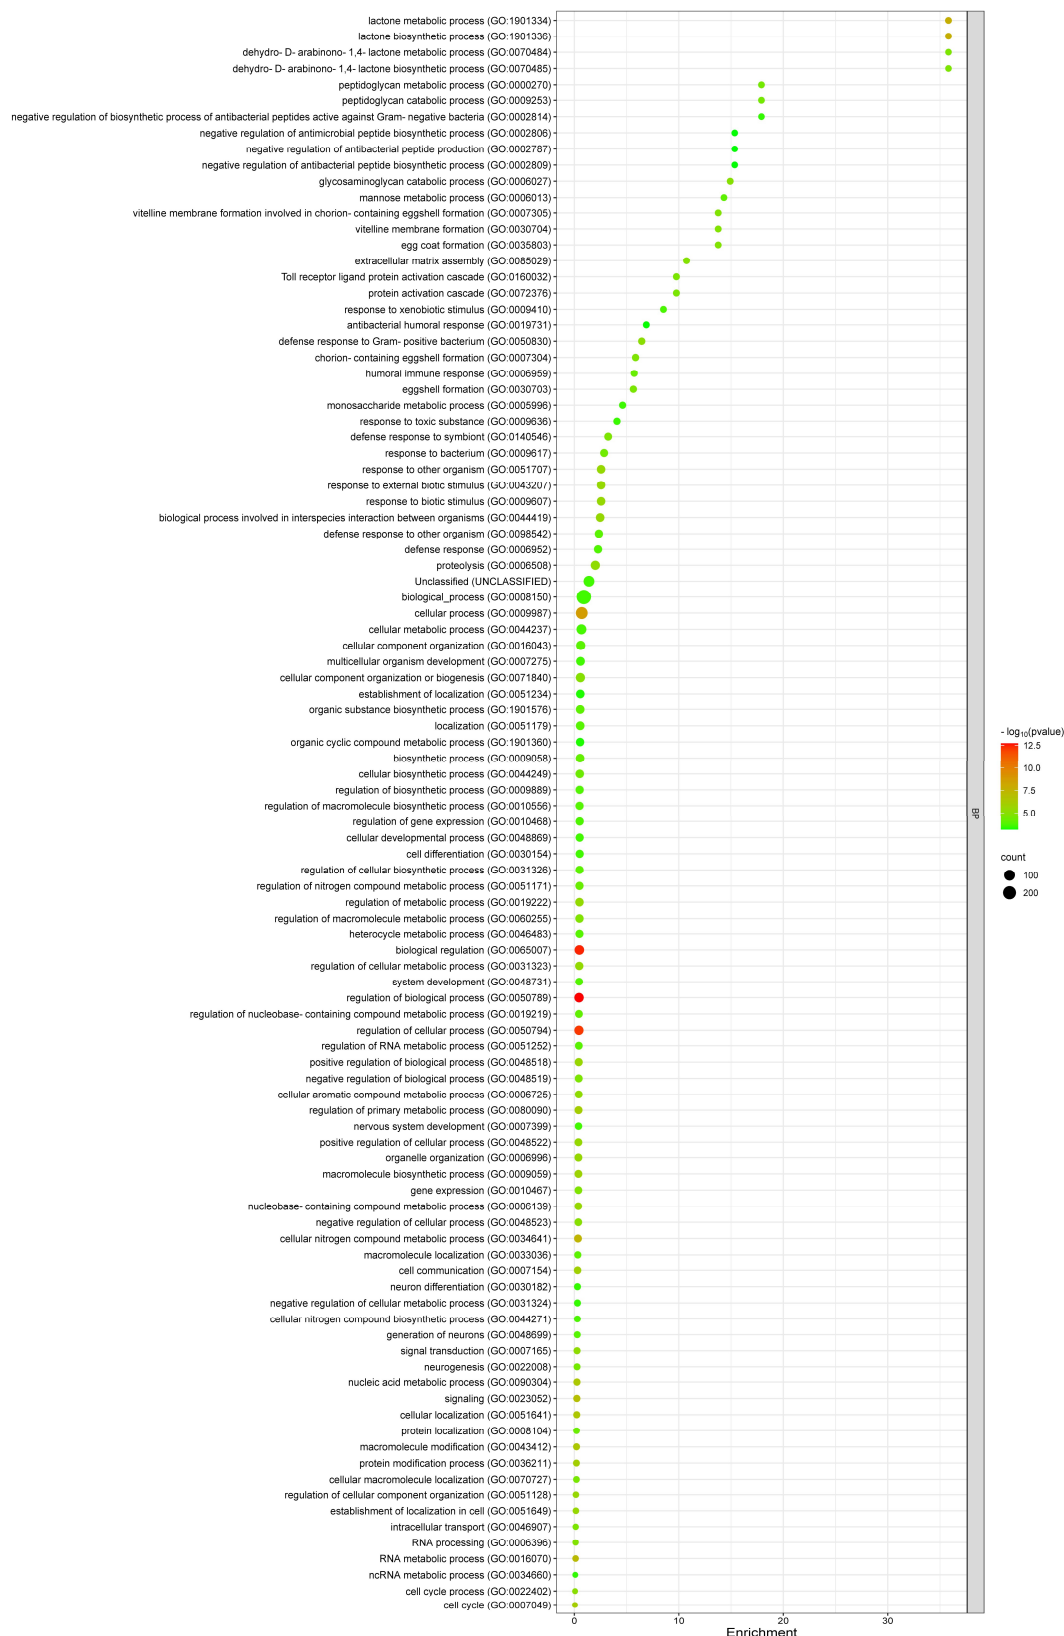

(C)

**Figure S1.** Functional classification of GO in RNA-seq. (A) Functional classification of GO about cellular component (CC); (B) Functional classification of GO about molecular function (MF); (C) Functional classification of GO about biological process (BP).

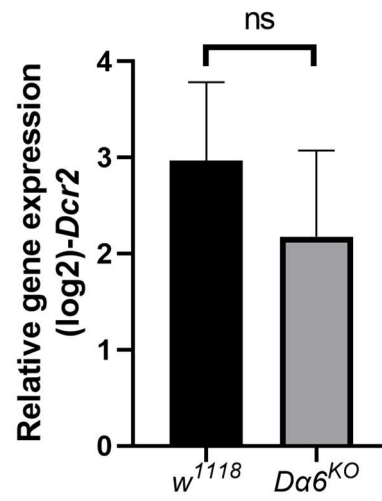

**Figure S2.** Difference in the expression of Dcr2 in the gene *Dα6* knockout strain flies compared with wild-type flies (*w<sup>1118</sup>*) at 6 days after infection with sigma virus.
